# Supplementary material for: A practical guide for probiotics applied to the case of antibiotic-associated diarrhea in The Netherlands
Source: BMC Gastroenterol. 2018 Aug 6;18:103. doi: 10.1186/s12876-018-0831-x (PMC6091175; doi:10.1186/s12876-018-0831-x)
Supplement: Supplementary file 1 — Side-effects of antibiotics. List of commonly prescribed antibiotics in The Netherlands, with information on class, mode of action, indication and side effects. (XLSX 29 kb) [file 12876_2018_831_MOESM1_ESM.xlsx]

## Sheet: Sheet1
Class, mechanism of action, indications and side effects of the most prescribed antibiotics in the Netherlands (in order from the most to the least prescribed)
Antibiotic	Class	Indicationa	Common side effectsa,b	Uncommon/rare side effectsa,b	Mechanism of action
Amoxicillin	Broad-spectrum penicillin (β-lactam antibiotic)	Respiratory tract infections	Diarrhea	Hypersensitivity (hives)	β-lactam antibiotic, it inhibits the synthesis of bacterial cell wall by inhibiting cross-linkage of peptidoglycan polymers that constitute the bacterial cell wall of Gram-positive bacteria
		Middle ear infections	Stomach/abdominal pain	Headache/dizziness
		Urinary tract infections	Nausea	Severe diarrhea and colitis (inflammation of the intestine)
		Gastrointestinal tract infections	Vomiting	Hepatitis (inflammation of the liver)
		Skin infections	Rash/itching	Blood problems (decrease in the number of white blood cells)
		Endocarditis (heart infection)	Altered taste
		Sexually transmitted diseases (chlamydia, gonorrhea)	Oral or vaginal yeast infections
		Lyme disease
		Typhoid and paratyphoid fever
		Meningitis
		Dental abscesses
		Helicobacter pilori infection (in combination with charithromycin)
Amoxicillin + clavulanate (Augmentin ®)	Broad-spectrum penicillin (β-lactam antibiotic) + β-lactamase inhibitor	Respiratory tract infections	Diarrhea	Rash/hives	β-lactam antibiotic+ β-lactamase inhibitor, active against bacteria that produce β-lactamase to inactivate the antibiotic
		Ear infections	Nausea	Indigestion
		Urinary tract infections	Vomiting	Headache/dizziness
		Gastrointestinal tract infections	Gas	Severe diarrhea and colitis (inflammation of the intestine)
		Skin and soft tissue infections	Stomach/abdominal pain	Liver disease
		Bone and joint infections	Oral or vaginal yeast infections	Blood problems (decrease in the number of white blood cells)
		Dental abscesses
		Sexually transmitted diseases (chlamydia, gonorrhea)
		Lyme disease
		Meningitis
Nitrofurantoin (Furabid ®)	Nitrofuran derivative	Urinary tract infections (treatment and prevention)	Temporary hair loss		Nitrofurantoin is reduced by flavoproteins (nitrofuran reductases) inside the bacterial cells, resulting in reactive intermediates that attack ribosomal proteins, DNA and other macromolecules in the cell.
			Diarrhea
			Nausea
			Vomiting
			Loss of appetite
			Abdominal pain
			Yellow or brown urine
			Dizziness/Drowsiness
			Gas, upset stomach
			Vaginal itching/discharge
Doxycycline (Efracea ®)	Tetracycline	Respiratory tract infections	Nausea	Headache	It interferes with protein synthesis (tetracyclines bind to the ribosomes, preventing translation of mRNA in proteins)
		Acne/Skin infections	Abdominal pain	Muscle and joint pain
		Urinary tract infections	Vomiting	Sensitivity to light
		Intestinal infections	Diarrhea	Hypersensitivity (rash/hives)
		Eye infections	Skin irritation	Esophageal inflammation
		Lyme disease	Oral or vaginal yeast infections	Hepatitis
		Malaria		Pancreatitis
		Q-fever
		Sexually transmitted diseases (chlamydia, gonorrhea, syphilis)
		Brucellosis
		Cholera
		Periodontitis
		Traveler’s diarrhea
Azithromycin (Zithromax ®)	Macrolide	Respiratory tract infections	Diarrhea	Constipation	It interferes with protein biosynthesis in bacterial cells by binding to the 50S subunit of the bacterial ribosome thus inhibiting translation of mRNA
		Ear infections	Nausea	Sleep disturbances
		Skin infections	Abdominal pain	Chest pain
		Traveler’s diarrhea	Gas	Palpitations
		Sexually transmitted diseases (chlamydia, gonorrhea)	Vomiting	Joint pain
		Lyme disease	Loss of appetite	Gastritis
			Stomach/abdominal pain	Hepatitis
			Headache, dizziness	Hypersensitivity to sunlight
			Fatigue	Blood problems (decrease in the number of white blood cells)
			Oral or vaginal yeast infections	Hypersensitivity (rash/itching)
				Taste disturbances
Ciprofloxacin (Ciproxin ®)	Fluoroquinolone	Bone and joint infections	Nausea	Headache, dizziness	Broad-spectrum antibiotic, works against Gram-positive and Gram-negative bacteria by inhibiting cell division through the inhibition of enzymes necessary to separate bacterial DNA
		Urinary tract infections	Diarrhea	Tendinitis
		Respiratory tract infections	Vomiting	Cardiac arrhythmia
		Middle ear infections	Gas	Rash/itching/hives
		Eye infections	Stomach/abdominal pain	Hypersensitivity to sunlight Loss of appetite
		Skin and soft tissue infections		Feeling weak
		Gastrointestinal tract infections		Sleep disturbances
		Pelvic inflammatory disease		Taste disturbances
		Meningitis		Abdominal pain/gas/indigestion
		Septicemia		Vomiting
		Sexually transmitted diseases (gonorrhea)		Joint pain
		Traveler’s diarrhea		Fungal infections
		Anthrax
Flucloxacillin (Floxapen ®)	β-lactamase-resistant penicillin (β-lactam antibiotic)	Respiratory tract infections	Diarrhea	Hypersensitivity	Narrow-spectrum antibioticum, it interferes with the synthesis of bacterial cell wall by inhibiting peptidoglycan crosslinking
		Ear infections	Nausea	Hives
		Skin and soft tissue infections	Vomiting	Colitis
		Endocarditis (heart infection)	Rash/itching	Hepatitis
		Bone and joint infections		Blood problems (decrease in the number of white blood cells)
		Meningitis
		Enteritis (intestinal infection)
		Septicemia (blood infection)
		Kidney infections
		Urinary tract infections
Clarithromycin (Klacid ®)	Macrolide	Respiratory tract infections	Change in taste and smell	Loss of appetite	Interference with protein biosynthesis in bacterial cells (it binds to the 23S portion of the 50S subunit of bacterial ribosomes inhibiting translation of mRNA into peptides)
		Skin and soft tissue infections	Nausea	Headache/dizziness
		Middle ear infections	Vomiting	Hearing problems
		Gastric ulcers caused by Helicobacter pilori	Diarrhea	Palpitations
		Lyme disease	Stomach/abdominal pain	Cardiac arrhythmia
			Oral or vaginal yeast infections	Lung problems
			Rash	Muscle pain
				Hepatitis
				Constipation
				Blood disorders
				Discoloration of tongue and teeth
				Psychological symptoms (depression, anxiety)
Trimethoprim	Trimethoprim	Urinary tract infections (treatment and prevention)	Nausea	Sore mouth or tongue	Interferes with the bacterial synthesis of tetrahydrofolic acid (THF), precursor in the thymidine synthesis pathway, and ultimately it inhibits bacterial DNA synthesis
		Respiratory tract infections	Vomiting	Hypersensitivity
		Ear infections	Diarrhea	Yeast infection
			Rash	Colitis
			Itching	Blood disorder
Trimethoprim/Sulfamethoxazole (Bactrimel ®)	Trimethoprim + Sulfonamide	Ear infections	Nausea	Discoloration of tongue and teeth	Interferes with the bacterial synthesis of tetrahydrofolic acid (THF), precursor in the thymidine synthesis pathway, and ultimately it inhibits bacterial DNA synthesis
		Urinary tract infections	Vomiting
		Respiratory tract infections	Loss of appetite
		Gastrointestinal tract infections (travelers’ diarrhea)	Diarrhea
		Shigellosis	Rash, itching
		Pneumocystis jirovecii pneumonia	Sensitivity to UV light
			Dizziness, headaches
			Muscle and joint pain
			Yeast infection
			Psychological symptoms
			Cardiac arrhythmia
Pheneticillin (Broxil ®)	Penicillin (β-lactam antibiotic)	Respiratory tract infections	Diarrhea	Intestinal inflammation	β-lactam antibiotic, it inhibits the synthesis of bacterial cell wall by inhibiting cross-linkage of peptidoglycan polymers that constitute the bacterial cell wall of Gram-positive bacteria
		Skin infections	Abdominal cramps	Severe diarrhea
			Nausea	Hypersensitivity
			Vomiting	Blood problems (decrease in the number of white blood cells)
			Rash, itching
Minocycline	Tetracycline	Urinary tract infections	Reduced production of white cells	Nausea	It interferes with protein synthesis by binding to the 30S ribosomal subunit preventing translation of mRNA.
		Respiratory tract infections		Vomiting
		Skin infections (acne)		Abdominal pain
		Gastrointestinal tract infections		Loss of appetite
		Sexually transmitted diseases (gonorrhea, chlamydia, syphilis)		Diarrhea
		Tick fever		Dizziness
				Inflamed mucous membranes
				Hypersensitivity to light
				Hypersensitivity (rash, hives)
				Esophageal irritation
				Pancreas inflammation
				Liver disease
Norfloxacine	Fluoroquinolone	Urinary tract infections	Nausea	Hypersensitivity to sunlight	It interferes with bacterial cell division by inhibiting DNA gyrase and topoisomerase IV, two enzymes that are necessary to correctly separate DNA prior to cell division.
			Vomiting	Tendon inflammation
			Abdominal pain	Blood disorders
			Diarrhea	Cardiac arrhythmia
			Headache	Psychological symptoms (anxiety, depression)
			Dizziness
			Rash, itching
Clindamycin (Dalacin ®)	Lincosamide	Skin and soft tissue infections	Diarrhea	Hypersensitivity (rash, itching)	Interference with protein biosynthesis in bacterial cells (it binds to the 23S portion of the 50S subunit of bacterial ribosomes inhibiting translation of mRNA into peptides)
		Respiratory tract infections	Abdominal pain	Skin condition (blistering)
		Bacterial vaginosis	Stomach pain	Liver disease
		Joint and bone infections	Nausea	Reduced production of white cells and platelets
		Abdominal cavity infections	Vomiting	Join inflammation
		Dental abscesses	Bowel inflammation	Blockade of nerves and muscles
		Parasitic infections (malaria, toxoplasmosis, trichomoniasis)	Esophageal inflammation
			Inflammation of the oral mucosa
			Fungal or yeast infections of mucous membranes
Fosfomycin (Monuril ®)	Other antibacterial agents	Urinary tract infections	Nausea	Skin rash, itching, hives	Inhibits bacterial cell wall biogenesis by inactivating an enzyme responsible for peptidoglycan biosynthesis
		Respiratory tract infections	Vomiting	Numbness/tingling in limbs
		Bone marrow inflammation	Diarrhea	Fatigue
		Meningitis	Abdominal pain	Hypersensitivity
			Headaches, dizziness
			Vaginal infections
Erythromycin (Erythrocine-es ®)	Macrolide	Respiratory tract infections	Nausea	Hepatitis	Interference with protein biosynthesis in bacterial cells (it binds to the ribosome inhibiting translation of mRNA into peptides)
		Middle ear infections	Vomiting	Hypersensitivity (rash, hives)
		Mouth infections	Abdominal pain	Severe diarrhea
		Skin and soft tissue infections	Stomach pain	Colitis
		Eyelid infections	Diarrhea	Pancreatitis
		Stomach and intestine infections	Gas	Cardiac arrhythmia
		Urinary tract infection	Loss of appetite	Skin conditions
		Sexually transmitted diseases (chlamydia, syphilis, gonorrhea)	Fungal or yeast infection of mucous membranes
		Diphtheria
		Scarlet fever
		Lyme disease
		Acne
Levofloxacin (Tavanic ®)	Fluoroquinolone	Urinary tract infections	Nausea	Abdominal pain	It interferes with bacterial cell division by inhibiting DNA gyrase and topoisomerase IV, two enzymes that are necessary to correctly separate DNA prior to cell division.
		Respiratory tract infections	Diarrhea	Vomiting
		Skin infections	Headache, dizziness	Loss of appetite
		Prostatitis	Rash, itching	Fungal infections
		Tubercolosis		Tendon inflammation
				Pain in muscles and joints
				Sensitivity to sunlight
				Blood disorders (reduced number of white blood cells)
				Cardiac arrhythmias
				Hepatitis
Benzathine Benzylpenicillin (Tardocillin ®)	β-lactamase-sensitive penicillin (β-lactam antibiotic)	Respiratory tract infections	Headache	Hypersensitivity	β-lactam antibiotic, it inhibits the synthesis of bacterial cell wall by inhibiting cross-linkage of peptidoglycan polymers that constitute the bacterial cell wall of Gram-positive bacteria
		Middle ear infections	Fever	Severe diarrhea and bowel inflammation
		Skin and soft tissue infections	Muscle and joint pain	Blood disorders (reduced number of white blood cells)
		Endocarditis	Heart palpitations	Kidney failure
		Bone infections	High blood pressure
		Septicaemia	Diarrhea
		Lyme disease	Abdominal pain
		Tetanus	Nausea
		Diphtheria	Vomiting
		Gonorrhea, yphilis	Rash itching
		Meningitis
Moxifloxacine (Avelox ®)	Fluoroquinolone	Respiratory tract infections	Nausea	Hypersensitivity to sunlight	It interferes with bacterial cell division by inhibiting DNA gyrase and topoisomerase IV, two enzymes that are necessary to correctly separate DNA prior to cell division.
		Skin infections	Vomiting	Tendon inflammation
		Stomach infections	Abdominal pain	Sleep disturbances
		Pelvic inflammatory disease	Diarrhea	Heart palpitations
		Tubercolosis	Headache, dizziness	Cardiac arrhythmia
			Vaginal infection (candidiasis)	Blood disorders
			Rash, itching	Hepatitis
				Psychological symptoms (anxiety, depression)
				Hypersensitivity
Ofloxacine	Fluoroquinolone	Urinary tract infections	Stomach/abdominal pain	Headache, dizziness	It interferes with bacterial cell division by inhibiting DNA gyrase and topoisomerase IV, two enzymes that are necessary to correctly separate DNA prior to cell division.
		Respiratory tract infections	Nausea	Hypersensitivity (rash, itching)
		Gastrointestinal tract infections	Vomiting	Hypersensitivity to sunlight
		Skin and soft tissue infections	Diarrhea	Tendon inflammation
		Septicemia		Blood disorders
		Cystic fibrosis		Palpitations
		Gonorrhea, chlamydia		Cardiac arrhythmia
		Pelvic inflammatory disease		Psychological symptoms
		Cervicitis
		Leprosy
		Tuberculosis
Tetracycline	Tetracycline	Skin infections (acne, rosacea)		Nausea	It interferes with protein synthesis by binding to the 30S ribosomal subunit preventing translation of mRNA.
		Respiratory tract infections		Vomiting
		Urinary tract infections		Abdominal pain
		Gastrointestinal tract infections		Diarrhea
		Sexually transmitted diseases (chlamydia, syphilis, gonorrhea)		Inflamed mucous membranes
		Brucellosis		Increased sensitivity to sunlight
		Leptospirosis		Hypersensitivity
		Tetanus		Liver disease
		Cholera		Esophagus irritation
				Blood disorder
Methenamine (Reflux ®)	Heterocyclic organic compound	Urinary tract infections	Nausea		At an acidic pH it decomposes to formaldehyde (bactericidal) and ammonia.
			Stomach irritation
			Bladder irritation
			Painful/difficult urination
			Rash, ithing
Cefuroxim (Zinnat ®)	Cephalosporin (β-lactam antibiotic)	Respiratory tract infections	Diarrhea	Rash	β-lactam antibiotic, it inhibits the synthesis of bacterial cell wall
		Middle ear infections	Nausea	Decreased numbers of white blood cells
		Urinary tract infections	Vomiting	Itching
		Skin and soft tissues infections	Headache	Hives
		Cervicitis	Fungal/yeast infections	Bowel infection
		Gonorrhea		Hypersensitivitys
		Cystic fibrosis		Hepatitis
		Lyme disease		Nephritis
		Septicemia		Fever
Pipemidinezuur (Pipram ®)	Quinolone (pyridopyrimidine)	Urinary tract infections		Nausea	It inhibits bacterial cell division by targeting DNA gyrase, an enzyme necessary for correct DNA replication
				Vomiting
				Abdominal pain
				Diarrhea
				Headache, dizziness
				Hypersensitivitys (rash, itching)
				Hypersensitivity to sunlight
				Tendon inflammation
				Blood disorders
				Psychological symptoms
Ceftriaxone (Rocephin ®)	Cephalosporin (β-lactam antibiotic)	Respiratory tract infections	Diarrhea	Decreased levels of white blood cells, red blood cells and platelets	β-lactam antibiotic, it inhibits the synthesis of bacterial cell wall
		Middle ear infections	Nausea	Hypersensitivity
		Urinary tract infections	Vomiting	Inflammation of oral mucosa
		Meningitis		Headache, dizziness
		Skin and soft tissue infections		Fungal infections
		Sexually transmitted diseases (gonorrhea, syphilis)		Irritation, redness, pain (if injected)
		Septicemia		Kidney damage
		Lyme disease		Liver disease
				Inflammation of the stomach or intestine
Roxithromycin	Macrolide	Respiratory tract infections	Nausea	Temporary change in taste/smell	Interference with protein biosynthesis in bacterial cells (it binds to the 50S ribosomal unit inhibiting translation of mRNA into peptides)
		Middle ear infections	Vomiting	Temporary hearing loss
		Legionella	Abdominal pain	Liver disease
		Chlamydia, gonorrhea	Diarrhea	Cardiac arrhythmia
			Headache, dizziness	Blistering
			Rash, itching	Blood problems (decreased number of white cells and platelets)
			Fungal or yeast infection of mucous membranes
Cefaclor (Ceclor ®)	Cephalosporin (β-lactam antibiotic)	Respiratory tract infections	Diarrhea	Fever	β-lactam antibiotic, it inhibits the synthesis of bacterial cell wall
		Middle ear infections	Nausea	Joint pain
		Skin and soft tissues infections	Vomiting	Bowel infection
		Urinary tract infections	Rash, itching	Inflamed mucous membranes
				Reduced levels of blood cells
				Liver or kidney disorders
				Sleeping disorders
				Hyperactivity
Fenoxymethylpenicillin	Penicillin (β-lactam antibiotic)	Respiratory tract infections	Diarrhea	Severe diarrhea	β-lactam antibiotic, it inhibits the synthesis of bacterial cell wall
		Skin and soft tissue infections	Abdominal cramps	Colitis (bowel inflammation)
		Middle ear infections	Nausea	Severe Hypersensitivity
		Scarlet fever	Vomiting	Blood disorder (reduced number of white blood cells)
		Dental abscesses	Rash, itching	Vaginal yeast infection
		Tonsillitis	Hypersensitivity
		Rheumatic fever (prevention)
		Streptococcal infections (treatment and prevention)
		Pneumococcal infections (prevention)
Tobramycin (Tobi podhaler ®)	Aminoglycoside antibiotic	Pseudomonas infections (treatment of chronic infections in patients with cystic fibrosis)	Cough	Shortness of breath	Interferes with translation of mRNA into proteins by binding to the bacterial 30S and 50S ribosomal subunits, and therefore preventing the formation of the 70S complex.
		Meningitis	Voice changes	Sore throat
		Stomach and intestine infections		Hearing loss
		Gall bladder infections		Vertigo, dizziness
		Urinary tract infections		Abdominal pain
		Prostatitis		Nausea
		Bone infections		Vomiting
		Skin and soft tissue infections		Diarrhea
				Fever
				Headache
				Changes in taste
				Fungal infection in mouth or throat
				Hypersensitivity (rash, itching)
				Colitis
Colistin (Tadim ®)	Polymyxin	Pseudomonas infections (treatment of chronic infections in patients with cystic fibrosis)	Cough, chest tightness, shortness of breath	Hypersensitivity	It interacts with the bacterial outer membrane, displacing ions in the lipopolysaccharide, and then it acts as a detergent towards the cytoplasmic membrane, solubilizing it in an aqueous environment
		Stomach and intestine infections	Sore throat, throat irritation	Blurred vision
			Weak voice/voice loss	Numbness/tingling in limbs
			Inflammation of the mouth/tongue	Psychological symptoms
			Nausea	Impaired renal function
			Vomiting
			Fever, fatigue
			Vertigo, balance problems
Ceftibuten (Cedax ®)	Cephalosporin (β-lactam antibiotic)	Respiratory tract infections	Nausea	Fever	β-lactam antibiotic, it inhibits the synthesis of bacterial cell wall
		Middle ear infections	Diarrhea	Hypersensitivity
		Urinary tract infections	Decreased appetite	Fungal infection of mucous membranes
				Reduced numbers of white blood cells
				Kidney damage
				Liver disease
Cephalexin (Keforal ®)	Cephalosporin (β-lactam antibiotic)	Respiratory tract infections	Diarrhea	Headache, dizziness	β-lactam antibiotic, it inhibits the synthesis of bacterial cell wall
		Urinary tract infections	Abdominal pain	Fatigue
		Skin infections	Nausea	Fever
		Ear infections	Vomiting	Join pain
			Hypersensitivity (rash, itching)	Inflamed mucous membranes
				Reduced numbers of blood cells
				Kidney damage
				Excitement, confusion
Cefotaxime (Claforan ®)	Cephalosporin (β-lactam antibiotic)	Respiratory tract infections	Pain and inflammation at injection site	Irritation of blood vessel (intravenous injection)	β-lactam antibiotic, it inhibits the synthesis of bacterial cell wall
		Skin infections	Mild diarrhea	Headache, dizziness
		Urinary tract infections Gonorrhea	Fever	Diarrhea
		Lyme disease	Rash, itching	Abdominal pain
		Meningitis		Nausea
		Septicemia		Vomiting
		Endocarditis		Loss of appetite
		Bone and joint infections		Inflammation of mucous membranes
		Peritonitis		Hypersensitivity (hives, itching)
		Pelvic inflammatory disease
Linezolid (Zyvoxid ®)	Oxazolidinone	Respiratory tract infections	Nausea	Inflammation of the mouth	Protein synthesis inhibitor, it stops the growth and reproduction of bacteria by disrupting translation of mRNA during initiation (first step of protein synthesis)
		Skin infections	Vomiting	Abdominal pain, constipation
		Tuberculosis	Diarrhea	Fever
			Fungal/yeast infections of mucous membranes	Fatigue
			Increase in blood pressure	Hair loss
			Metallic taste	Vaginal irritation
			Headache, dizziness	Hypersensitivity
			Skin problems (itching, rash)
Vancomycin (Vancocin ®)	Glycopeptide antibiotic	Respiratory tract infections	Pain at the site of injection	Nausea	Inhibition of cell wall synthesis in Gram-positive bacteria
		Endocarditis	Nausea	Hearing
		Bone marrow inflammation	Stomach pain	Blood problems (reduced numbers of white blood cells)
			Fungal/yeast infections of mucous membranes	Dizziness
			Hypersensitivity
			Kidney damage
Metronidazole	Nitroimidazole	Skin infections	Nausea	Hypersensitivity	Inhibits DNA synthesis by disrupting DNA of microbial cells
		Bacterial vaginosis	Diarrhea	Brain disorder
		Mouth and throat infections	Abdominal pain	Blood disorder
		Dental abscesses	Metallic taste	Inflammation of pancreas/liver
		Stomach infections	Loss of appetite
		Intestinal infections	Rash, itching
		Parasitic infections (Giardia, Trichomonas)	Headache, dizziness
		Peritonitis	Cardiac arrhythmias
		Bone infections	Muscle ache
		Septicemia	Joint pain
		Necrotizing pneumonia
		Treatment of H. pylori in the presence of peptic ulcers
