# Supplementary material for: A practical guide for probiotics applied to the case of antibiotic-associated diarrhea in The Netherlands
Source: BMC Gastroenterol. 2018 Aug 6;18:103. doi: 10.1186/s12876-018-0831-x (PMC6091175; doi:10.1186/s12876-018-0831-x)
Supplement: Supplementary file 2 — List of reviewed studies. All the clinical trials that were reviewed are listed with indication of first author, publication title, publication date, whether they were included in the review, and, in case, reasons for exclusion. (XLSX 26 kb) [file 12876_2018_831_MOESM2_ESM.xlsx]

## Sheet: Sheet1
Clinical trials reviewed
Year	Author	Journal	Inclusion (Y/N)	reason for exclusion	Title
2013	Allen	Lancet	Y		Lactobacilli and biﬁdobacteria in the prevention of antibiotic-associated diarrhoea and Clostridium diﬃ cile diarrhoea in older inpatients (PLACIDE): a randomised, double-blind, placebo-controlled, multicentre trial
1999	Arvola	Pediatrics	Y		Prophylactic Lactobacillus GG reduces antibiotic-associated diarrhea in children with respiratory infections: a randomized study
2007	Beausoleil	Canadian Journal of Gastroenterology	Y		Effect of a fermented milk combining Lactobacillus acidophilus CL1285 and Lactobacillus casei in the prevention of antibiotic-associated diarrhea: A randomized, double-blind, placebo-controlled trial
2005	Correa	Journal of Clinical Gastroenterology	Y		A randomized formula controlled trial of Bifidobacterium lactis and Streptococcus thermophilus for prevention of antibiotic associated diarrhea in infants.
2013	Chatterjee	The Journal of the Association of Physicians of India	Y		Randomised placebo-controlled double blind multicentric trial on efficacy and safety of Lactobacillus acidophilus LA-5 and Bifidobacterium BB-12 for prevention of antibiotic-associated diarrhoea
2011	Cimperman	Journal of Clinical Gastroenterology	Y		A randomized, double-blind, placebo-controlled pilot study of Lactobacillus reuteri ATCC 55730 for the prevention of antibiotic-associated diarrhea in hospitalized adults
2015	Fox	BMJ	Y		Can probiotic yogurt prevent diarrhea in children on antibiotics? A double-blind, randomized, placebo-controlled study
2010	Gao	The American Journal of Gastroenterology	Y		Dose-response efficacy of a proprietary probiotic formula of Lactobacillus acidophilus CL1285 and Lactobacillus casei LBC80R for AAD and CAD prophylaxis in adult patients
2015	Georgieva	Journal of IMAB	Y		Use of the probiotic Lactobacillus reuterii DSM 17938 in the prevention of antibiotic-associated infections in hospitalized Bulgarian children: a randomized, controlled trial
2007	Hickson	BMJ	Y		Use of protiobic Lactobacillus preparation to prevent AAD
2008	Koning	The American Journal of Gastroenterology	Y		The effect of a multispecies probiotic on the intestinal microbiota and bowel movements in healthy volunteers taking the antibiotic amoxicillin
2010	Koning	British Journal of Nutrition	Y		The effect of a multispecies probiotic on the composition of the faecal microbiota and bowel habits in chronic obstructive pulmonary disease patients treated with antibiotics
2005	Kotowska	Alimentary Pharmacology and Therapeutics	Y		Saccharomyces boulardii in the prevention of antibiotic-associated diarrhea in children, a randomized double-blind placebo-controlled study
1998	Lewis	Journal of Infection	Y		The lack of therapeutic effect of Saccharomyces boulardii in the prevention of antibiotic related diarrhoea in elderly patients
2010	Lonnermark	Journal of Clinical Gastroenterology	Y		Intake of Lactobacillus plantarum reduces certain gastrointestinal symptoms during treatment with antibiotics
1995	McFarland	The American Journal of Gastroenterology	Y		Prevention of beta-lactam associated diarrhea by Saccharomyces boulardii compared with placebo
2005	Myllyluoma	Alimentary Pharmacology and Therapeutics	Y		Probiotic supplementation improves tolerance to Helicobacter pylori eradication therapy: a placebo-controlled, double-blind randomized pilot study
2012	Pozzoni	The American Journal of Gastroenterology	Y		Saccharomyces boulardii for the prevention of antibiotic-associated diarrhea in adult hospitalized patients: a single-center, randomized, doubleblind, placebo-controlled trial
2008	Ruszczynski	Alimentary Pharmacology and Therapeutics	Y		Clinical trial: effectiveness of Lactobacillus rhamnosus (strains E ⁄ N, Oxy and Pen) in the prevention of antibiotic-associated diarrhoea in children
2008	Safdar	Journal of Clinical Pharmacy and Therapeutics	Y		Feasability and tolerability of probiotics for prevention of antibiotic-associated diarrhea in hospitalized US veterans
2010	Sampalis	Archives of Medical Science	Y		Efficacy of Bio-K + CL1285 in the reduction of AAD
2013	Selinger	Journal of Hospital Infection	Y		Probiotic VSL#3 prevents antibiotic-associated diarrhea in a double-blind, randomized, placebo-controlled clinical trial
2010	Song	Journal of Korean Medical Science	Y		Effect of probiotic Lactobacillus (Lacidofil Cap) for the prevention of antibiotic-associated diarrhea: a prospective, randomized, double-blind, multicenter study
1989	Surawicz	Gastroenterology	Y		Prevention of antibiotic-associated diarrhea with Saccharomyces boulardii: a prospective study
2009	Szajewska	Journal of Pediatric Gastroenterology and Nutrition	Y		Randomized, Double-blind, Placebo-controlled Trial: Effect of Lactobacillus GG Supplementation on Helicobacter Pylori Eradication Rates and Side Effects During Treatment in Children
2008	Szymanski	Digestion	Y		Bifidobacterium longum PL03, Lactobacillus rhamnosus KL53A, and Lactobacillus plantarum PL02 in the prevention of antibiotic-associated diarrhea in children: a randomized controlled pilot trial.
1990	Tankanow	DICP: The annals of pharmacotherapy	Y		Double-blind, placebo-controlled study of the efficacy of Lactinex in the prophylaxis of amoxicillin-induced diarrhea
1999	Vanderhoof	The Journal of Pediatrics	Y		Lactobacillus GG in the prevention of antibiotic-associated diarrhea in children
2008	Wenus	European Journal of Clinical Nutrition	Y		Prevention of antibiotic-associated diarrhea by a fermented probiotic milk drink
2016	Evans	British Journal of Nutrition	Y		Effectiveness of Lactobacillus helveticus and Lactobacillus rhamnosus for the management of antibiotic-associated diarrhoea in healthy adults: A randomised, double-blind, placebo-controlled trial.
2014	Ouwehand	Vaccine	Y		Probiotics reduce symptoms of antibiotic use in a hospital setting: a randomized dose response study.
2014	Patel	Journal of Pharmaceutical Health Services Research	Y		Randomized study of probiotics in primary care
1981	Monteiro	Acta Medica Portuguesa	N	A	Ensaio clinico duplamente cego da ultra-levure na profulaxia das perturbacaes gastro-intestinais e muco-cutaneas da antibioterapia
1994	Orrhage	Microbial Ecology in Health and Disease	N	A	Effect of supplements with Biﬁdobacterium longum and Lactobacillus acidophilus on the intestinal microbiota during administration of Clindamycin
2003	Seki	Pediatrics International	N	A	Prevention of antibiotic-associated diarrhea in children by Clostridium butyricum MIYAIRI
2014	Hood	Health Technology Assessment	N	A	Probiotics for Antibiotic-Associated Diarrhoea (PAAD): A prospective observational study of antibiotic-associated diarrhoea (including Clostridium difficile-associated diarrhoea) in care homes.
2002	Ahuja	Journal of the Indian Medical Association	N	B	Antibiotic-associated diarrhoea: a controlled study comparing plain antibiotic with those containing protected lactobacilli
2003	Beniwal	Digestive Diseases and Science	N	B	A randomized trial of yogurt for prevention of antibiotic associated diarrhea
2015	Bin	Pediatric Gastroenterology, Hepatology and Nutrition	N	B	The efficacy of Saccharomyces boulardii CNCM I-745 in addition to standard Helicobacteri pylori eradication treatment in children
1982	Borgia	Current Therapeutic Research	N	B	A controlled clinical study on Streptococcus faecium preparation for the prevention of side reactions during long-term antibiotic treatments
2013	Casem	Journal of Clinical Gastroenterology	N	B	Saccharomyces boulardii in the prevention of antibiotic-associated diarrhea in children: a randomized controlled trial
1991	Contardi	La clinica terapeutica	N	B	Oral bacterial therapy in prevention of antibiotic-induced diarrhea in childhood
2007	Conway	The British Journal of General Practice	N	B	Does eating yogurt prevent antibiotic-associated diarrhoea? A placebo-controlled randomised controlled trial in general practice.
2014	Dietrich	World Journal of Gastroenterology	N	B	Commercially available probiotic drinks containing Lactobacillus casei DN-114001 reduce antibiotic-associated diarrhea
2005	Duman	European Journal of Gastroenterology and Hepatology	N	B	Efficacy and safety of Saccharomyces boulardii in prevention of antibiotic-associated diarrhoea due to Helicobacter pylori eradication
2004	Erdeve	Journal of Tropical Pediatrics	N	B	The probiotic effect of Saccharomyces boulardii in a pediatric age group
2008	Imase	Microbiology and Immunology	N	B	Efﬁcacy of Clostridium butyricum preparation concomitantly with Helicobacter pylori eradication therapy in relation to changes in the intestinal microbiota
2008	Kim	Helicobacter	N	B	The effects of probiotics on PPI-triple therapy for Helicobacter eradication
2004	Lighthouse	Hepatology Research	N	B	Endotoxinemia and benzodiazepine-like substances in compensated cirrhotic patients: a randomized study comparing the effect of rifaximine alone and in association with a symbiotic preparation.
2012	Ojetti	Gastroenterology Research and Practice	N	B	Impact of Lactobacillus reuteri supplementation on anti-helicobacter pylori levofloxacin-based second-line therapy.
2002	Sheu	Alimentary Pharmacology and Therapeutics	N	B	Impact of supplement with Lactobacillus- and Bifidobacterium-containing yogurt on triple therapy for Helicobacter pylori eradication
2005	Shimbo	World Journal of Gastroenterology	N	B	Effect of Clostridium butyricum on fecal ﬂora in Helicobacter pylori eradication therapy
2007	Park	Hepatogastroenterology	N	B	The effect of probiotics on Helicobacter pylori eradication
2010	Song	Helicobacter	N	B	The effect of probiotics and mucoprotective agents on PPI-based triple therapy for eradication of Helicobacter pylori
2013	Shan	Beneficial microbes	N	B	Prevention and treatment of diarrhoea with Saccharomyces boulardii in children with acute lower respiratory tract infections
2004	Tursi	Medical Science Monitor	N	B	Effect of Lactobacillus casei supplementation on the effectiveness and tolerability of a new second-line 10-day quadruple therapy after failure of a first attempte to cure Helicobacter pylori infection
1995	Witsell	The Journal of Otolaryngology	N	B	Effect of Lactobacillus acidophilus on antibiotic-associated gastrointestinal morbidity: A prospective randomized trial
2012	Du	World Journal of Gastroenterology	N	B	Adjuvant probiotics improve the eradication effect of triple therapy for Helicobacter pylori infection
2011	de Vrese	Journal of Dairy Research	N	B	Probiotic lactobacilli and bifidobacteria in a fermented milk product with added fruit preparation reduce antibiotic associated diarrhea and Helicobacter pylori activity
2011	Yoon	Gastroenterology and Hepatology	N	B	Effects of multistrain probiotic-containing yogurt on second-line triple therapy for Helicobacter pylori infection
2014	Wong	British Journal of Nutrition	N	B	A Lactobacillus casei Shirota probiotic drink reduces antibiotic-associated diarrhoea in patients with spinal cord injuries: a randomised controlled trial
2013	Kyriakos	Hospital Chronicles	N	B	A Lyophilized Form of Saccharomyces Boulardii Enhances the Helicobacter pylori Eradication Rates of Omeprazole-Triple Therapy in Patients With Peptic Ulcer Disease or Functional Dyspepsia
2012	Chu	African Journal of Pharmacy and Pharmacology	N	B	Intervention study on Saccharomyces boulardii with proton pump inhibitor (PPI)-based triple therapy for Helicobacter pylori related peptic ulcer
2013	Zojaji	Gastroenterology and Hepatology from bed to bench	N	B	The efficacy and safety of adding the probiotic Saccharomyces boulardii to standard triple therapy for eradication of H.pylori: a brandomized controlled trial
2016	Zakordonets	Research Journal of Pharmaceutical, Biological and Chemical Sciences	N	B	Different Regimes of Multiprobiotic for Prevention of Immediate and Delayed Side Effects of Antibiotic Therapy In Children
2012	Tolone	Italian Journal of Pediatrics	N	B	Evaluation of Helicobacter Pylori eradication in pediatric patients by triple therapy plus lactoferrin and probiotics compared to triple therapy alone
2004	Schrezenmeir	Clinical Pediatrics	N	C	Benefits of oral supplementation with and without synbiotics in young children with acute bacterial infections
2005	Pereg	American Journal of Infection Control	N	C	The effect of fermented yogurt on the prevention of diarrhea in a healthy adult population
2001	Armuzzi	Alimentary Pharmacology and Therapeutics	N	D	The effect of oral administration of Lactobacillus GG on antibiotic-associated gastrointestinal side-effects during Helicobacteri pylori eradication therapy.
2006	Can	Medical Science Monitor	N	D	Profhylactic Saccharomyces boulardii in the prevention of antibiotic-associated diarrhea: a prospective study
2007	Cindoruk	Helicobacter	N	D	Efficacy and safety of Saccharomyces boulardii in the 14-day triple anti-Helicobacter pylori therapy: a prospective randomized placebo-controlled double-blind study
2002	Cremonini	American Journal of Gastroenterology	N	D	Effect of different probiotic preparations on anti-Helicobacter pylori therapy-related side effects: a parallel group, triple blind, placebo-controlled study
2009	Engelbrektson	Journal of Medical Microbiology	N	D	Probiotics to minimize the disruption of faecal microbiota in healthy subjects undergoing antibiotic therapy
2013	Khodadad	Iranian Journal of Pediatrics	N	D	Probiotics for the treatment of pediatric Helicobacter pilori infection, a randomized double-blind clinical trial
2012	Mirzaee	Iranian Red Crescent Medical Journal	N	D	Randomized control trial: Comparison of triple therapy plus probiotic yogurt vs. standard triple therapy on helicobacter pylori eradication.
2009	Merenstein	Archives of Pediatrics and Adolescent Medicine	N	D	A randomized clinical trial measuring the influence of kefir on antibiotic-associated diarrhea: the measuring the influence of Kefir (MILK) Study
2004	Nista	Alimentary Pharmacology and Therapeutics	N	D	Bacillus clausii therapy to reduce side-effects of anti-Helicobacter pylori treatment: randomized, double-blind, placebo controlled trial.
1997	Nord	Clinical Microbiology and Infection	N	D	Oral supplementation with lactic acid-producing bacteria during intake of clindamycin
2004	Plummer	International Microbiology	N	D	Clostridium difficile pilot study: effect of probiotic supplementation on the incidence of C. difficile diarrhoea
1990	Siitonen	Annals of Medicine	N	D	Effect of Lactobacillus GG yoghurt in prevention of antibiotic associated diarrhoea
2003	Sullivan	Journal of Antimicrobial Chemotherapy	N	D	Lactobacillus acidophilus, Bifidobacterium lactis and Lactobacillus F19 prevent antibiotic-associated ecological disturbances of Bacteroidetes fragilis in the intestine
2004	Sullivan	Journal of Antimicrobial Chemotherapy	N	D	Effect of Lactobacillus F19 on the emergence of antibiotic-resistant microorganisms in the intestinal microﬂora
2014	Forssten	World Journal of Gastroenterology	N	D	Influence of a probiotic mixture on antibiotic induced microbiota disturbances.
2015	Hauser	Medicine	N	D	Probiotics for standard triple Helicobacter pylori eradication: a randomized, double-blind, placebo-controlled trial.
2010	Yasar	The Turkish journal of gastroenterology	N	D	Efficacy of probiotics in Helicobacteri pylori eradication therapy
2014	Francavilla	Journal of Clinical Gastroenterology	N	D	Lactobacillus reuteri strain combination in Helicobacter pylori infection: a randomized, double-blind, placebo-controlled study.
2005	Sykora	Journal of Clinical Gastroenterology	N	D	Effects of a specially designed fermented milk product containing probiotic Lactobacillus casei DN-114 001 and the eradication of H. pylori in children: a prospective randomized double-blind study
2008	Klarin	Acta Anaesthesiologica Scandinavica	N	E	Lactobacillus plantarum 299v reduces colonisation of Clostridium difﬁcile in critically ill patients treated with antibiotics
2001	Felley	European Journal of Gastroenterology and Hepatology	N	E	Favourable effect of an acidified milk (LC-1) on Helicobacter pylori gastritis in man
1979	Gotz	American Journal of Health-System Pharmacy	N	F	Prophylaxis against ampicillin-associated diarrhea with a lactobacillus preparation
2015	Wright	Australasian Journal of Ageing	N	F	Probiotic treatment for the prevention of antibiotic-associated diarrhea in geriatric patients: a multicentre randomised controlled pilot study
2001	Thomas	Mayo Clinic Proceedings	N	F	Lack of effect of Lactobacillus GG on antibioticassociated diarrhea: a randomized, placebo-controlled trial
1994	McFarland	JAMA	N	G	A randomized placebo-controlled trial of Saccharomyces boulardii in combination with standard antibiotics for Clostridium difficile disease
2000	Surawicz	Clinical Infectious Diseases	N	G	The search for a better treatment for recurrent Clostridium difficile disease: Use of high-dose Vancomycin combined with Saccharomyces boulardii
2003	Wullt	Scandinavian Journal of Infectious Disease	N	G	Lactobacillus plantarum 299v for the treatment of recurrent Clostridium difﬁcileassociated diarrhoea: a double-blind, placebo-controlled trial
2012	Souza	Revista de Sociedade Brasileira de Medicina Tropical	N	G	The effect of Lactobacillus casei and Bifidobacterium breve on antibiotic-associated diarrhea treatment: Randomized double-blind clinical trial.
1989	Wunderlich	The Journal of International Medical Research	N	G	Double-blind report on the efﬁcacy of lactic acid-producing Enterococcus SF68 in the prevention of antibiotic-associated diarrhoea and in the treatment of acute diarrhoea
2015	Barker	Contemporary Clinical Trials	N	G	Probiotics for Clostridium difficile infection in adults (PICO): Study protocol for a double-blind, randomized controlled trial
2012	Francavilla	Alimentary Pharmacology and Therapeutics	N	G	Randomised clinical trial: Lactobacillus reuteri DSM 17938 vs. placebo in children with acute diarrhoea - a double-blind study
2014	Zhao	Chinese Journal of Contemporary Pediatric	N	H	Clinical effect of triple therapy combined with Saccharomyces boulardii in the treatment of Helicobacter pylori infection in children
2012	Zheng	Chinese Journal of Pediatric	N	H	Multicenter, randomized, controlled clinical trial on preventing antibiotic-associated diarrhea in children with pneumonia using the live Clostridium butyricum and Bifidobacterium combined powder
2011	Saneeyan	Journal of Isfahan Medical School	N	H	Effectiveness of probiotic on treatment of Helicobacter pylori infection in children
1976	Adam	Médecine et Chirurgie Digestives	N	H	Controlled double blind clinical trials of Ultra-Levure:Multicentre study by 25 physicians in 388 case
2008	Bravo	Revista Medica de Chile	N	H	Effect of probiotic Saccharomyces boulardii on prevention of antibiotic-associated diarrhea in adult outpatients with amoxicillin treatment
2013	Padilla Ruiz	Revista de Gastroenterologia del Peru	N	H	Lactobacillus rhamnosus GG supplementation to reduce side-effects of anti-Helicobacter pylori treatment
1999	Benhamou	Médecine & Chirurgie Digestives	N	H	Antibiotic-associated diarrhoea in children: A computer monitored double-blind outpatients trial comparing a protective and a probiotic agent.
1976	Ligny	Ars Medici	N	H	Le traitement par le perenterol des troubles intestinaux secondaires a l’antibiotherapie
2003	La Rosa	Minerva Pediatrica	N	H	Prevention of antibiotic-associated diarrhea with Lactobacillus sporogens and fructo-oligosaccharides in children. A multicentric double-blind vs placebo study
2007	Stein	Harefuah	N	H	Probiotics as prophylactic agents against antibiotic-associated diarrhea in hospitalized patients
2007	de Bortoli	American Journal of Gastroenterology	N	I	Helicobacter pylori eradication: a randomized prospective study of triple therapy versus triple therapy plus lactoferrin and probiotics
2015	Dinleyici	Jornal de Pediatria	N	L	Lactobacillus reuteri DSM 17938 shortens acute infectious diarrhea in a pediatric outpatient setting
2010	Morrow	American Journal or Respiratory and Critical Care Medicine	N	L	Probiotic prophylaxis of ventilator-associated pneumonia: A blinded, randomized, controlled trial
2016	Namkin	Iranian Journal of Pediatrics	N	L	Saccharomyces boulardii in helicobacter pylori eradication in children: A randomized trial from Iran.
1992	Reid	Clinical Therapeutics	N	M	Influence of three-day antimicrobial therapy and lactobacillus vaginal suppositories on recurrence of urinary tract infections
2013	Allen	Health Technology Assessment	N	N	A high-dose preparation of lactobacilli and bifidobacteria in the prevention of antibiotic-associated and clostridium difficile diarrhoea in older people admitted to hospital: A multicentre, randomised, double-blind, placebo-controlled, parallel arm trial (PLACIDE).
2013	Allen	Gut	N	N	Placide: Probiotics in the prevention of antibiotic associated diarrhoea (AAD) and clostridium difficile associated diarrhoea (CDD) in elderly patients admitted to hospital-results of a large multi-centre RCT in the UK.
2008	Destura		N	O	Bacillus clausii in preventing antibiotic associated diarrhea among Filipino infants and children: A multi-center, randomized, open-label clinical trial of efﬁcacy and safety.
2008	Miller		N	O	Results of Two Prospective Randomized Studies of Lactobacillus GG (LGG) to Prevent C. difficile Infection (CDI) in Hospitalized Adults Receiving Antibiotics
2007	Rafiq	Gastroenterology	N	P	Prevention of Clostridium difficile diarrhoea with probiotics in hospitalized patients treated with antibiotics
1986	Frigerio	Digestive Diseases and Sciences	N	P	A lactic acid produce enterococcus in the prevention of antibiotic-associated diarrhea and in the treatment of acute diarrheal disorders
2002	Jirapinyo	Journal of the Medical Association of Thailand	N	P	Prevention of antibiotic-associated diarrhea in infants by probiotics
2010	King	Pharmacotherapy	N	P	Randomized, double-blind, placebo-controlled trial to assess the efficacy of Lactobacillus GG in the prevention of antibiotic-associated diarrhea in the pediatric intensive care unit (PICU)
2010	Li	Canadian Journal of Gastroenterology	N	P	Use of probiotics for prevention of antibiotic-associated diarrhea in elderly patients
2011	Selinger	GUT	N	P	VSL#3 for the prevention of antibiotic associated diarrhoea (AAD) and clostridium difficile associated diarrhoea (CDAD): an interim analysis
2014	Ziakas	Annals of Internal Medicine	N	P	Probiotics did not prevent antibiotic -associated or C. difficile diarrhea in hospitalized older patients.
1998	Vaisanen	Microbial Ecology in Health and Disease	N	P	Occurrence of diarrhea in children receiving oral antibiotics with or without probiotic supplementation with Lactobacillus GG
2012	Lehtinen	Journal of Gastroenterology and Hepatology	N	P	A probiotic combination to reduce antibiotic associated diarrhoea and other side-effects of antibiotic-use; a dose-response study.
2011	Bhalla	The Journal of Clinical Pharmacology	N	P	Randomized placebo-controlled, double blind, multicentric trial on efficacy and fafety of Providac techsules (Lactobacillus acidophilus LA-5 and Bifidobacterium BB -12) for prevention of Antibiotic-Associated Diarrhea in Indian patients
		Total studies included	32
		Total studies excluded	96
		Reason for exclusion
		A = no randomization	4
		B = no placebo	30
		C = not a double blind	2
		D = no clear definition of AAD	19
		E = AAD not measured	2
		F = duration of probiotic administration not clear	3
		G = ongoing diarrhea at the beginning of the trial	7
		H = article not in English	10
		I = probiotic tested in combination with another product	1
		L = antibiotics not prescribed (or not to all patients)	3
		M = not about AAD	1
		N = results published in another paper	2
		O = unpublished	2
		P = study not available	10
