# Supplementary material for: A practical guide for probiotics applied to the case of antibiotic-associated diarrhea in The Netherlands
Source: BMC Gastroenterol. 2018 Aug 6;18:103. doi: 10.1186/s12876-018-0831-x (PMC6091175; doi:10.1186/s12876-018-0831-x)
Supplement: Supplementary file 3 — Characteristics of included studies. For every study included in this review, information on study population (number of patients enrolled, age, setting, country, diagnosis and antibiotics prescribed), probiotic treatment (composition, daily dose, intake form, brand, duration of treatment) and outcome (definition of AAD, incidence in probiotic and placebo groups, significance of difference, relative risk) is summarized. (XLSX 39 kb) [file 12876_2018_831_MOESM3_ESM.xlsx]

## Sheet: Sheet1
Year	Journal	Author	Title	DOI	Reviews that include the trial	Study available	Type of study	Power analysis	Country	Setting	Age group	Number (enrolled/completed)	Condition	Antibiotic	Probiotic (composition)	Daily dose (cfu)	Form	Brand/Product	Duration of treatment	Follow up period	Outcome measured	Definition of diarrhea	AAD in treatment group	AAD in control group	Significant difference treatment-control	RR	notes
2013	Lancet	Allen	Lactobacilli and biﬁ dobacteria in the prevention of antibiotic-associated diarrhoea and Clostridium diﬃ cile diarrhoea in older inpatients (PLACIDE): a randomised, double-blind, placebo-controlled, multicentre trial	10.1016/S0140-6736(13)61218-0		YES	randomized, placebo-controlled, double-blind	YES	UK		elderly (>65 y)	2941			Lactobacillus acidophilus CUL60, Lactobacillus acidophilus CUL21, Bifidobacterium bifidum W23, Bifidobacterium lactis CUL34 - CUL20	6x10^10	capsule		21 days	8-12 weeks after completion of antibiotic treatment	frequency of AAD during follow up period	3 or more loose stools in a 24 hour period	159/1470 (10.8%)	153/1471 (10.4%)	NO	1.03846
1999	Pediatrics	Arvola	Prophylactic Lactobacillus GG reduces antibiotic-associated diarrhea in children with respiratory infections: a randomized study		Goldenberg 2015, Goldenberg 2013, Szajewska 2016, Videlock 2012, Hempel 2012, Kale-Pradhan 2010, Johnston 2011, Johnston 2006, McFarland 2006, Szajewska 2006, Hawrelack 2005, Cremonini 2002	YES	randomized, placebo-controlled, double-blind	NO	Finland	hospitals (5 patients hospitalized, the rest outpatients)	children (2 weeks/12.8 years; 4.5 y average)	167/119	respiratory tract infections	penicillin, amoxicillin, cephalosporins, erythromycin, trimethoprim-sulfonamide	Lactobacillus rhamnosus GG	4x10^10	capsule		same as antibiotic therapy (7 to 10 days)	3 months	Diarrhea during the first 2 weeks after the beginning of antibiotic treatment	at least 3 watery or loose stools per day for a minimum of 2 consecutive days	3/61 (5%)	9/58 (16%)	YES	0.3125
2007	Canadian Journal of Gastroenterology	Beausoleil	Effect of a fermented milk combining Lactobacillus acidophilus CL1285 and Lactobacillus casei in the prevention of antibiotic-associated diarrhea: A randomized, double-blind, placebo-controlled trial		Goldenberg 2013, Videlock 2012, Hempel 2012, Kale-Pradhan 2010, Pattani 2013	YES	randomized, placebo-controlled, double-blind	YES	Canada	hospital	adults/elderly (54/85 y; 70 y average)	89/89	respiratory tract infections; other	beta-lactam, macrolide, quinolone	Lactobacillus acidophilus CL1285, Lactobacillus casei LBC80R, Lactobacillus rhamnosus CLR2	5x10^10	milk	Bio-K + CL1285	antibiotic therapy	21 days after the last antibiotic dose	Incidence of diarrhea during study and follow up periods	3 or more liquid stools in a 24 hour period	7/44 (15.9%)	16/45 (35.6%)	YES	0.446629
2013		Chatterjee	Randomised placebo-controlled double blind multicentric trial on efficacy and safety of Lactobacillus acidophilus LA-5 and Bifidobacterium BB-12 for prevention of antibiotic-associated diarrhoea			YES	randomized, placebo-controlled, double-blind	YES	India		adults (18-40y)	396/343	upper and lower respiratory tract infection; other infections	amoxicillin, cephadroxil	Lactobacillus acidophilus LA-5, Bifidobacterium lactis BB-12	4x10^9			14 days (antibiotic therapy + 1 week)	none (study ended with last dose of probiotic on day 14)	incidence of diarrhea at study end	3 or more watery or loose stools per day for at least 2 consecutive days	19/176 (10.8%)	26/167 (15.6%)	NO	0.692308
2011	Journal of Clinical Gastroenterology	Cimperman	A randomized, double-blind, placebo-controlled pilot study of Lactobacillus reuteri ATCC 55730 for the prevention of antibiotic-associated diarrhea in hospitalized adults	10.1097/MCG.0b013e3182166a42	Videlock 2012, Hempel 2012, Pattani 2013	YES	randomized, placebo-controlled, double-blind	NO	USA	hospital	adults (> 18 y, average 51 y)	23	pneumonia, abscess, chronic obstructive pulmonary disease, bronchitis	axithromycin, vancomycin, ceftriaxone, moxifloxacine, zosyn, clindamycin, meropenum, cefuroxime, ampicillin/sulbactam, ceftriaxone and meropenum	Lactobacillus reuteri ATCC 55730	2x10^8	chewable tablet	BioGaia Biologics, Sweden	28 days	2 weeks after last dose of probiotics	incidence of diarrhea during study and follow up periods	3 or more mushy or watery stools per day for at least 2 consecutive days (follow up until 2 weeks after the end of probiotic therapy)	1/13 (7.7%)	5/10 (50%)	YES	0.154
2005	Journal of Clinical Gastroenterology	Correa	A randomized formula controlled trial of Bifidobacterium lactis and Streptococcus thermophilus for prevention of antibiotic associated diarrhea in infants.		Goldenberg 2015, Szajewska 2016, Videlock 2012, Hempel 2012, Johnston 2011, McFarland 2006, Szajewska 2006	YES	randomized, formula-controlled, double-blind	YES	Brazil	hospitals	Infants (6/36 months)	169/157		penicillin, ampicillin, oxacillin, amoxicillin, cephalosporin, amoxicillin + clavulanic acid	Streptococcus thermophilus, Bifidobacterium lactis	5x10^8 (S. therm.), 5x10^9 (B. lactis)			15 days		Incidence of diarrhea during the 30 days of duration of the study	at least 3 watery or loose stools per day for a minimum of 2 consecutive days	13/80 (16.2%)	24/77 (31.2%)	YES	0.519231
2016	British Journal of Nutrition	Evans	Effectiveness of Lactobacillus helveticus and Lactobacillus rhamnosus for the management of antibiotic-associated diarrhoea in healthy adults: A randomised, double-blind, placebo-controlled trial.	10.1017/S0007114516001665		YES	randomized, placebo-controlled, double-blind	YES			adults (34 y average)	160/146		amoxicillin + clavulanic acid	Lactobacillus helveticus R0052 (2x10^8), Lactobacillus rhamnosus R0011 (3.8x10^9)	8x10^9	capsule	Lacidofil Strong	14 days (antibiotic therapy + 1 week)	4 weeks after last dose of probiotic	incidence of diarrhea during the study and follow up periods	3 or more stools per day and/or stool consistency ≥5 on the Bristol Stool Scale for at least 2 consecutive days	19/76 (25%)	21/70 (33%)	NO	0.833333
2015	BMJ	Fox	Can probiotic yogurt prevent diarrhea in children on antibiotics? A double-blind, randomized, placebo-controlled study		Goldenberg 2015, Szajewska 2016	YES	randomized, placebo-controlled, double-blind	YES	Australia	multisite general care (outpatient)	Children (1/12 years)	70	ear, throat and chest infection	Beta-lactams mostly, macrolides, tetracyclines	Lactobacillus rhamnosus GG, Bifidobacterium lactis Bb-12, Lactobacillus acidophilus La-5	5.2x10^9 (L. rhamn.), 5.9x10^9 (B. lactis), 8.3x10^9 (L. acido.)	yogurt	Vaalia, Parmalat	antibiotic therapy + 1 week	1 week after last dose of antibiotic (until last dose of probiotic)	Incidence of diarrhea during study period (until end of probiotic administration)	multiple definitions (I use: 2 or more stools per day and a fecal consistency ≥5 on the Bristol stool scale for at least 2 days)	1/34 (2.9%)	21/36 (58.3%)	YES	0.0497427
2010	The American Journal of Gastroenterology	Gao	Dose-response efficacy of a proprietary probiotic formula of Lactobacillus acidophilus CL1285 and Lactobacillus casei LBC80R for AAD and CAD prophylaxis in adult patients	10.1038/ajg.2010.11	Goldenberg 2013, Videlock 2012, Hempel 2012, Pattani 2013	YES	randomized, placebo-controlled, double-blind	YES	China	hospital	Adults (60 years average)	255		penicillin, cephalosporin, clindamycin	Lactobacillus acidophilus CL1285, Lactobacillus casei LBC80R, Lactobacillus rhamnosus CLR2	50-100x10^9	capsules	Bio-K, Laval	antibiotic therapy + 5 days	21 days after the last probiotic dose	Incidence of diarrhea during study and follow up periods: 15.5% diarrhea in treatment 2 (2 capsules), 28.2% in treatment 1 (1 capsule), 44.1% in control (I report placebo and treatment 1)	3 or more liquid stools in a 24 hour period	24/85 (28.2%)	37/84 (44%)	YES	0.640909
2015	Journal of IMAB	Georgieva	Use of the probiotic Lactobacillus reuterii DSM 17938 in the prevention of antibiotic-associated infections in hospitalized Bulgarian children: a randomized, controlled trial		Goldenberg 2015	YES	randomized, placebo-controlled, double-blind	YES	Bulgaria	hospital	Children (3-12 years)	97	Infections of respiratory, gastrointestinal, pancreas, eyes, ears nose, throat, urinary tracts or systems	amikacin, cefazoline, cefotaxime, ceftriaxon, cefuroxime, levofloxacin, metronidazol, piperacillin	Lactobacillus reuteri DSM 17938	1x10^8	tablet	BioGaia AB, Stockholm	antibiotic therapy + 7 days	21 days after the last antibiotic dose	Incidence of diarrhea during and up to 21 days post antibiotic treatment	at least 3 watery or loose stools per day for a minimum of 2 consecutive days occurred during or up to 21 days after the cessation of the antibiotic treatment	1/49 (2.04%)	1/48 (2.08%)	NO	0.980769
2007	BMJ	Hickson	Use of protiobic Lactobacillus preparation to prevent AAD	10.1136/bmj.39231.599815.55	Goldenberg 2013, Videlock 2012, Hempel 2012, Pattani 2013, Avadhani 2011	YES	randomized, placebo-controlled, double-blind	YES	England	hospital	adults (74 years average)	135/113	respiratory tract infection, urinary tract infection, prophylaxis before/after surgery		Lactobacillus casei DN-114 001 (1x10^8cfu/ml), Streptococcus thermophilus (1x10^8cfu/ml), Lactobacillus bulgaricus (1x10^7cfu/ml)	10^10 (L. casei), 10^10 (S. thermo.), 1x10^9 (L. bulg.)	fermented milk	Actimel, Danone	antibiotic therapy + 7 days	4 weeks after last antibiotic dose	Incidence of diarrhea during study and follow up periods	2 or more liquid stools a day for 3 or more days	7/57 (12.3%)	19/56 (33.9%)	YES	0.362832
2008	The American Journal of Gastroenterology	Koning	The effect of a multispecies probiotic on the intestinal microbiota and bowel movements in healthy volunteers taking the antibiotic amoxicillin	10.1111/j.1572-0241.2007.01547.x	Goldenberg 2013, Videlock 2012, Hempel 2012	YES	randomized, placebo-controlled, double-blind	YES	Netherlands	hospital	adults (27 years average)	40		amoxicillin	Bifidobacterium bifidum W23, Bifidobacterium lactis W18, Bifidobacterium longum W51, Enterococcus faecium W54, Lactobacillus acidophilus W37, Lactobacillus acidophilus W55, Lactobacillus paracasei W20, Lactobacillus plantarum W62, Lactobacillus rhamnosus W71, Lactobacillus salivarius W24	10^10	sachet	Winclove Ecologic AAD	14 days (antibiotic therapy + 7 days)	7 weeks after the last antibiotic dose	incidence of diarrhea during the probiotic administration period	3 or more stools per day and/or fecal consistency ≥5 on the Bristol stool scale per day for at least 2 days	9/19 (47.3%)	15/19 (78.9%)	YES	0.599493
2010	British Journal of Nutrition	Koning	The effect of a multispecies probiotic on the composition of the faecal microbiota and bowel habits in chronic obstructive pulmonary disease patients treated with antibiotics	10.1017/S0007114509993497	Videlock 2012, Hempel 2012	YES	randomized, placebo-controlled, double-blind	YES	Netherlands	hospital	adults (18-80 y, 60 y average)	45/30	chronic obstructive pulmonary disease	doxycycline, amoxicillin/clavulanic acid	Bifidobacterium bifidum W23, Bifidobacterium lactis W51, Enterococcus faecium W54, Lactobacillus acidophilus W37, Lactobacillus acidophilus W55, Lactobacillus paracasei W20, Lactobacillus plantarum W62, Lactobacillus rhamnosus W71, Lactobacillus salivarius W24	10^10	sachet (5g)	Winclove Ecologic AAD	14 days (antibiotic therapy + 7 days)	7 weeks after the last antibiotic dose	incidence of diarrhea during the probiotic administration period	3 or more stools per day and/or fecal consistency ≥5 on the Bristol stool scale per day for at least 2 days	13/17 (76.5%)	9/13 (69.2%)	NO	1.10549
2005	Alimentary Pharmacology and Therapeutics	Kotowska	Saccharomyces boulardii in the prevention of antibiotic-associated diarrhea in children, a randomized double-blind placebo-controlled study		Goldenberg 2015, Goldenberg 2013, Szajewska 2016, Videlock 2012, Hempel 2012, Johnston 2011, Johnston 2006, McFarland 2006, Szajewska 2006	YES	randomized, placebo-controlled, double-blind	YES	Poland	3 pediatric hospitals and 2 outpatient clinics	Children (6 months/14 years)	246	otitis media, respiratory tract infections	cefuroxime axetil, co-amoxiclav, amoxicillin, cefuroxime, penicillin, clarithromycin, roxithromycin	Saccharomyces boulardii	10^10			antibiotic therapy (7-9d)	2 weeks after the end of the antibiotic therapy	incidence of diarrhea during and/or up to 2 weeks after the end of the antibiotic therapy	at least 3 watery or loose stools per day for a minimum of 2 consecutive days occurring during or up to 2 weeks after the end of the antibiotic treatment	9/119 (7.6%)	29/127 (22.8%)	YES	0.333333
1998	Journal of Infection	Lewis	The lack of therapeutic effect of Saccharomyces boulardii in the prevention of antibiotic related diarrhoea in elderly patients		Goldenberg 2013, Videlock 2012, Xie 2015, Hempel 2012, Pattani 2013, Avadhani 2011, McFarland 2006, Dendukuri 2005, Cremonini 2002, D'Souza 2002	YES	randomized, placebo-controlled, double-blind	NO	UK	hospital	elderly (> 65 y)	72/69			Saccharomyces boulardii	226 mg		Ultra-Levure, Biocodex	antibiotic therapy	none (study ended at the end of antibiotic therapy)	incidence of diarrhea during the study period	3 or more loose stools within a 24 hour period	7/33 (21.2%)	5/36 (13.9%)	NO	1.52518
2010		Lonnermark	Intake of Lactobacillus plantarum reduces certain gastrointestinal symptoms during treatment with antibiotics	10.1097/MCG.0b013e3181b2683f	Goldenberg 2013, Videlock 2012, Hempel 2012	NO	randomized, placebo-controlled, patient-blind	NO	Sweden	inpatients and outpatients	adults (45 y average)	163	air-way infection, skin/soft tissue infection, urinary tract infection, septicemia/meningitis, viral infection	cephalosporin, clindamycin, ampicillin	Lactobacillus plantarum 299v	10^10	milk drink	Skanemejerier	antibiotic therapy + 1 week	7-14 days after end of probiotic treatment	incidence of diarrhea	at least 3 loose or watery stools per day for at least 2 consecutive days	6/80 (75%)	5/83 (60.2%)	NO	1.24585
1995	The American Journal of Gastroenterology	McFarland	Prevention of beta-lactam associated diarrhea by Saccharomyces boulardii compared with placebo		Goldenberg 2013, Videlock 2012, Hempel 2012, Pattani 2013, Avadhani 2011, Tung 2009, McFarland 2006, Dendukuri 2005, Cremonini 2002, D'Souza 2002	YES	randomized, placebo-controlled, double-blind	NO	USA	university hospitals	adults (18-86 years)	193		beta-lactam antibiotic	Saccharomyces boulardii	3x10^10			antibiotic therapy + 3 days (max 28 days)	7 weeks after the end of probiotic therapy	incidence of diarrhea during the study and follow up periods	3 loose stools per day for at least 2 consecutive days associated with at least one beta-lactam antibiotic	7/97 (7.2%)	14/96 (14.6%)	YES	0.493151
2005	Alimentary Pharmacology and Therapeutics	Myllyluoma	Probiotic supplementation improves tolerance to Helicobacter pylori eradication therapy: a placebo-controlled, double-blind randomized pilot study		Videlock 2012, Hempel 2012	YES	randomized, placebo-controlled, double-blind	NO	Finland	hospital	adults (24-69 years, 55 average)	47	Helicobacteri infection	lansoprazole+clarithromycin+amoxicillin	Lactobacillus rhamnosus GG (ATCC 53103) (3x10^8 cfu/ml), Lactobacillus rhamnosus LC705 (DSM 7061) (3x10^8 cfu/ml), Propionibacterium freudenreichii subsp shermanii JS (DSM 7076) (7x10^8 cfu/ml), Bifidobacterium breve Bb99 (DSM 13692) (7x10^6 cfu/ml)	13x10^10 (1 week), 6.5x10^10 (3 weeks)	milk-based drink	Valio	4 weeks (antibiotic therapy + 3 weeks)	6 weeks after the end of probiotic therapy	incidence of diarrhea during the probiotic therapy (intervention period)	at least 3 watery or loose stools per day for a minimum of 2 consecutive days	4/23 (17.4%)	2/24 (8.3%)	NO	2.09639
2014	Vaccine	Ouwehand	Probiotics reduce symptoms of antibiotic use in a hospital setting: a randomized dose response study.	10.1016/j.vaccine.2013.11.053		YES	randomized, placebo-controlled, triple-blind	YES	China	hospital	adults (30-70 y)	503/450	respiratory tract infection, urinary tract infection, prophylaxis before/after surgery	broad-spectrum penicillin,cephalosporin, clindamycin	Lactobacillus acidophilus NCFM (ATCC 700396), Lactobacillus paracasei Lpc-37 (ATCC SD5275), Bifidobacterium lactis Bi-07 (ATCC SD5220), Bifidobacterium lactis Bl-04 (ATCC SD5219)	4.17x10^9 (low dose), 1.70x10^10 (high dose)	capsule	Howaru Restore	antibiotic therapy + 1 week (10-21 days in total)	4 weeks after last antibiotic dose	incidence of diarrhea during study and follow up periods	3 or more liquid stools (Bristol Stool Chart Type 7) in a 24 h period	21/168 (12.5%)	41/167 (24.6%)	YES	0.50813
2014		Patel	Randomized study of probiotics in primary care	10.1111/jphs.12059		YES	randomized, placebo-controlled, double-blind	YES	USA	outpatients	adults	51/40			Lactobacillus acidophilus (7.5x10^9), Bifodobacterium lactis (6x10^9), Bifidobacterium longum (1.5x10^9)	6x10^10		Florajen 3, American Lifeline	14 days (antibiotic: 3 to 10 days)	none (study ended with last dose of probiotic at day 14)	incidence of diarrhea during the study period	3 or more bowel movements per day	8/22 (36.4%)	6/18 (33.3%)	NO	1.09309
2012	The American Journal of Gastroenterology	Pozzoni	Saccharomyces boulardii for the prevention of antibiotic-associated diarrhea in adult hospitalized patients: a single-center, randomized, doubleblind, placebo-controlled trial	10.1038/ajg.2012.56	Goldenberg 2013, Pattani 2013	YES	randomized, placebo-controlled, double-blind	YES	Italy	hospital	elderly (80 y average)	275/204		>40 different antibiotics	Saccharomyces boulardii	10^10	capsule	Codex, Biocodex, France	antibiotic therapy + 7 days	12 weeks	incidence of diarrhea during study or follow up periods	3 or more liquid stools per day for at least 2 days or at least 5 stools within 48 hours, up to 12 weeks after antibiotic discontinuation	16/106 (15.1%)	13/98 (13.3%)	NO	1.13534
2008	Alimentary Pharmacology and Therapeutics	Ruszczynski	Clinical trial: effectiveness of Lactobacillus rhamnosus (strains E ⁄ N, Oxy and Pen) in the prevention of antibiotic-associated diarrhoea in children	10.1111/j.1365-2036.2008.03714.x	Goldenberg 2015, Goldenberg 2013, Szajewska 2016, Videlock 2012, Hempel 2012, Kale-Pradhan 2010, Johnston 2011	YES	randomized, placebo-controlled, double-blind	YES	Poland	2 hospitals and 1 private practice	children (3 months/14 years)	240	respiratory tract infections, otitis media, urinary tract infection, skin infection	penicillin, Broad-spectrum penicillin, cephalosporin, macrolide, clindamycin	Lactobacillus rhamnosus (strains Pen, E/N, Oxy)	4x10^9	capsule	Lakcid Forte, Biomed (Poland)	antibiotic therapy	2 weeks after antibiotic period	incidence of diarrhea	at least 3 watery or loose stools per day for a minimum of 2 consecutive days occurring during or up to 2 weeks after the end of the antibiotic treatment (AAD was defined as diarrhea caused by C. difficile).	9/120 (7.5%)	20/120 (16.7%)	YES	0.449102
2008	Journal of Clinical Pharmacy and Therapeutics	Safdar	Feasability and tolerability of probiotics for prevention of antibiotic-associated diarrhea in hospitalized US veterans	10.1111/j.1365-2710.2008.00980.x	Goldenberg 2013, Videlock 2012, Xie 2015, Hempel 2012	YES	randomized, placebo-controlled, double-blind	YES	USA	hospital	adults (68 years average)	40/39	pulmonary infections, urinary tract infection, bacteremia, skin and soft tissue infection, cholangitis	beta-lactams, fluoroquinolones, macrolides	Lactobacillus acidophilus	6x10^10	capsule	Florajen, American Lifeline	antibiotic therapy + 14 days	none (not specified, probably until the end of probiotic period)	incidence of diarrhea during the study period	bowel movement consistency of 1,2 or 3 on the Stool Consistency Continuum for 2 or more consecutive days	4/23 (17.4%)	6/16 (37.5%)	NO	0.464
2010	Archives of Medical Science	Sampalis	Efficacy of Bio-K + CL1285 in the reduction of AAD	10.5114/aoms.2010.13508	Goldenberg 2013, Videlock 2012, Hempel 2012, Pattani 2013	YES	randomized, placebo-controlled, double-blind	YES	Canada	hospitals	adults (60 years average)	437	respiratory tract infections, skin infections, genitourinary tract infections	beta-lactams, quinolones, macrolides, clindamycin, other	Lactobacillus acidophilus CL1285, Lactobacillus casei LBC80R, Lactobacillus rhamnosus CLR2	5x10^10	fermented milk	Bio-K + CL1285	antibiotic therapy + 5 days (between 29 and 40 days)	21 days after the end of probiotic period	incidence of diarrhea during study and follow up periods	1 or more liquid stools in 24 hours	47/216 (21.8%)	65/221 (29.4%)	NO	0.741497
2013	Journal of Hospital Infection	Selinger	Probiotic VSL#3 prevents antibiotic-associated diarrhea in a double-blind, randomized, placebo-controlled clinical trial	10.1016/j.jhin.2013.02.019		YES	randomized, placebo-controlled, double-blind	YES	UK	hospital	adults (57 years average)	229/122		penicillins and broad-spectrum penicillins, cephalosporins, quinolones, macrolides, aminoglycosides, imidazoles	Bifidobacterium breve BB02, Bifidobacterium longum BL03, Bifidobacterium infantis BI04, Lactobacillus acidophilus BA05, Lactobacillus plantarum BP06, Lactobacillus paracasei BP07, Lactobacillus delbrueckii subsp bulgaricus BD08, Streptococcus thermophilus BT01	9x10^11	sachet	VSL#3	antibiotic therapy + 1 week	4 weeks after the last antibiotic dose	incidence of diarrhea during study and follow up periods	more than 2 liquid stools (Bristol stool chart types 6 and 7) a day for 2 or more days	5/117 (4.3%)	10/112 (8.9%)	NO	0.483146	*ITT (intention to treat) analysis: 4.3% in treatment, 8.9% in control: not significant
2010	Journal of Korean Medical Science	Song	Effect of probiotic Lactobacillus (Lacidofil Cap) for the prevention of antibiotic-associated diarrhea: a prospective, randomized, double-blind, mulitcenter study	10.3346/jkms.2010.25.12.1784	Hempel 2012	YES	randomized, placebo-control, double-blind	YES	Korea	hospitals	adults (60 years average)	172	respiratory tract infections	cephalosporin, macrolides, fluoroquinolones, clindamycin, penicillin	Lactobacillus rhamnosus R0011, Lactobacillus acidophilus R0052	4x10^9	capsule	Lacidofil cap	14 days	none (patients were followed up for 14 days which was also the duration of probiotic therapy)	incidence of diarrhea within 14 days of start of enrollment	loose or watery stools more than 3 times a day for at least 2 days	3/83 (3.6%)	5/89 (5.6%)	NO	0.642857	no changes in bowel frequency or consistency: 48.5% in treatment, 31.5% in placebo; The probiotic group was significantly less likely to experience changes in bowel frequency and consistency than the placebo group
1989	Gastroenterology	Surawicz	Prevention of antibiotic-associated diarrhea with Saccharomyces boulardii: a prospective study		Goldenberg 2013, Videlock 2012, Hempel 2012, Pattani 2013, Tung 2009, McFarland 2006, Dendukuri 2005, Cremonini 2002, D'Souza 2002	YES	randomized, placebo-controlled, double-blind	NO		hospital	adults (48 years average)	180		penicillin, clindamycin, cephalosporins, others	Saccharomyces boulardii	1g (2x10^10?)	capsule		antibiotic therapy + 2 weeks	few weeks after antibiotic therapy (but not clear, and not for all patients)	incidence of diarrhea during study and follow up periods	3 or more loose or watery stools per day for at least 2 days	11/116 (9.5%)	14/64 (21.9%)	YES	0.43379
2009	Journal of Pediatric Gastroenterology and Nutrition	Szajewska	Randomized, Double-blind, Placebo-controlled Trial: Effect of Lactobacillus GG Supplementation on Helicobacter Pylori Eradication Rates and Side Effects During Treatment in Children		Goldenberg 2015, Szajewska 2016, Videlock 2012, Hempel 2012, Johnston 2011	YES	randomized, placebo-controlled, double-blind	NO	Poland	hospital	Children (5/17 years)	83/	Helicobacter infection	Amoxicillin, clarithromycin and omeprazole	Lactobacillus rhamnosus GG	2x10^9			antibiotic therapy	6 weeks after enrollment	incidence of diarrhea during and/or up to 2 weeks after the end of antibiotic therapy	at least 3 watery or loose stools per day for a minimum of 2 consecutive days occurring during or up to 2 weeks after the end of the antibiotic treatment	2/34 (5.9%)	6/30 (20%)	NO	0.295
2008	Digestion	Szymanski	Bifidobacterium longum PL03, Lactobacillus rhamnosus KL53A, and Lactobacillus plantarum PL02 in the prevention of antibiotic-associated diarrhea in children: a randomized controlled pilot trial.		Goldenberg 2015, Szajewska 2016, Videlock 2012, Hempel 2012, Johnston 2011	YES	randomized, placebo-controlled, double-blind	NO	Poland	hospitals and clinics	Children (5 months/16 years)	78	otitis media, respiratory tract infections, urinary tract infection	amoxicillin, co-amoxicillin, cephalosporin, penicillin, macrolide, aminoglycoside	Bifidobacterium longum PL03, Lactobacillus rhamnosus KL53A, Lactobacillus plantarum PL02	10^8		IBSS Biomed, Poland	antibiotic therapy	2 weeks after end of antibiotic therapy	incidence of diarrhea during and/or up to 2 weeks after the end of antibiotic therapy	3 or more watery or loose stools per day for a minimum of 2 consecutive days occurring during or up to 2 weeks after the end of the antibiotic treatment	1/40 (2.5%)	2/38 (5.3%)	NO	0.471698
1990	DICP: The annals of pharmacotherapy	Tankanow	Double-blind, placebo-controlled study of the efficacy of Lactinex in the prophylaxis of amoxicillin-induced diarrhea		Goldenberg 2015, Szajewska 2016, Videlock 2012, Hempel 2012, Kale-Pradhan 2010, Johnston 2011, Johnston 2006, McFarland 2006, Szajewska 2006, D'Souza 2002	NO	randomized, placebo-controlled, double-blind	NO	USA	pediatric practice	Children (5 months to 6 years)	38		amoxicillin	Lactobacillus acidophilus, Lactobacillus bulgaricus	2x10^9	granules	Lactinex	10 days (same as antibiotic therapy		incidence of diarrhea: 66% in treatment, 69.5% in control	one or more abnormally loose bowel movements/day throughout the study period of 1 to 10 days	10/15 (66.7%)	16/23 (69.6%)	NO	0.958333
1999	The Journal of Pediatrics	Vanderhoof	Lactobacillus GG in the prevention of antibiotic-associated diarrhea in children		Goldenberg 2015, Szajewska 2016, Videlock 2012, Hempel 2012, Kale-Pradhan 2010, Johnston 2011, Johnston 2006, McFarland 2006, Szajewska 2006, Hawrelack 2005, Cremonini 2002, D'Souza 2002	YES	randomized, placebo-controlled, double-blind	YES	USA	private practice	children (6 months-10 yrs)	202/188	otitis media, pharyngitis, bronchitis, dermatological infection, sinusitis	amoxicillin, co-amoxicillin, cefprozil, clarithromycin, others	Lactobacillus rhamnosus GG	1-2x10^10	capsule	CAG Functional Foods (Nebraska)	antibiotic therapy 10 d)	none (patients were monitored during study only, so 10 days)	incidence of diarrhea during the study period	at least 2 liquid stools per day on at least 2 observation periods during the course of the study	7/93 (7.5%)	25/95 (26.3%)	YES	0.285171
2008	European Journal of Clinical Nutrition	Wenus	Prevention of antibiotic-associated diarrhea by a fermented probiotic milk drink		Goldenberg 2013, Videlock 2012, Hempel 2012, Pattani 2013, Avadhani 2011	YES	randomized, placebo-controlled, double-blind	YES	Norway	hospital	adults (58 years average)	87/63			Lactobacillus rhamnosus GG (1x10^8cfu/ml), Lactobacillus acidophilus LA-5 (1x10^8cfu/ml), Bifidobacterium lactis BB-12 (1x10^7cfu/ml)	2.5x10^10 (LGG), 2.5x10^9 (L.acido.), 2.5x10^10 (B.lactis)	milk drink	Biola TINE	14 days? Not clear	none (also not clear, patients probably only monitored during probiotic therapy)	incidence of diarrhea	at least 3 fluid stools per day for at least 2 days during the test period	2/34 (5.9%)	8/29 (27.6%)	YES	0.213768
